# Supplementary material for: An Outdoor Access Period Improves Chicken Cecal Microbiota and Potentially Increases Micronutrient Biosynthesis
Source: Front Vet Sci. 2022 Jul 14;9:904522. doi: 10.3389/fvets.2022.904522 (PMC9330014; doi:10.3389/fvets.2022.904522)
Supplement: Supplementary file 1 [file Table_1.XLSX]

## Sheet: LEfSe on PICRUST results
MetaCys pathways discriminating Y and A caecal bacterial communities as assessed by identified by LEfSe (p < 0.05 by Kruskal–Wallis test, p < 0.05 by pairwise Wilcoxon test and logarithmic LDA score of 2.0).
MetaCyc pathway	Description	MetaCIndoorc class level	ldascore	where	pvalue	01Indoor	02Indoor	03Indoor	04Indoor	06Indoor	07Indoor	08Indoor	09Indoor	10Indoor	01Outdoor	02Outdoor	03Outdoor	04Outdoor	06Outdoor	07Outdoor	08Outdoor	09Outdoor	10Outdoor
POLYAMINSYN3-PWY	superpathway of polyamine biosynthesis II	Amine and Polyamine Biosynthesis	Indoor	2.30062	0.037878	108.008	159.325	165.68	103.807	177.471	111.066	183.06	94.8759	68.5225	40.9939	98.5176	98.0338	163.301	59.6472	0	0	38.3043	91.3218
DAPLYSINESYN-PWY	L-lysine biosynthesis I	Amino Acid Biosynthesis	Indoor	2.96685	0.000348575	1036.94	885.943	1010.16	1299.2	1081.91	1019.48	1089.96	794.657	1022.02	666.645	450.24	774.641	989.461	680.157	546.801	1124.36	1035.3	434.925
HOMOSER-METSYN-PWY	L-methionine biosynthesis I	Amino Acid Biosynthesis	Indoor	3.06694	0.000348575	743.527	515.214	787.595	525.038	559.797	532.904	957.953	637.157	526.698	189.229	264.814	183.099	185.751	301.037	192.652	399.203	270.492	129.008
HSERMETANA-PWY	L-methionine biosynthesis III	Amino Acid Biosynthesis	Indoor	3.26468	0.000348575	943.987	772.284	878.761	1217.12	1258.45	1148.23	1026.83	743.056	1184.41	360.189	349.038	473.838	320.274	492.011	379.922	518.922	318.146	197.512
P4-PWY	superpathway of L-lysine, L-threonine and L-methionine biosynthesis I	Amino Acid Biosynthesis	Indoor	3.01864	0.000486766	837.27	808.558	930.064	758.178	860.452	735.496	1104.1	637.535	826.137	428.061	434.576	476.839	500.498	545.545	395.422	618.575	563.53	290.881
PWY-2941	L-lysine biosynthesis II	Amino Acid Biosynthesis	Indoor	2.42867	0.015117	54.6557	248.141	137.063	145.482	226.202	106.974	228.746	203.447	114.094	123.613	27.4583	117.813	62.6572	49.0943	0	157.818	0	136.921
PWY-5104	L-isoleucine biosynthesis IV	Amino Acid Biosynthesis	Indoor	2.22726	0.0243409	1843.21	1573.08	1772.35	2006.12	1954.27	1797.96	2031.35	1400.07	1757.03	1540.91	1064.78	1850.08	2313.43	2043.09	1550.35	3144.03	2281.95	1165.94
PWY-5345	superpathway of L-methionine biosynthesis (by sulfhydrylation)	Amino Acid Biosynthesis	Indoor	2.65195	0.00231581	436.84	439.817	378.353	580.394	524.696	525.989	357.895	257.811	302.169	257.811	179.193	293.657	288.238	421.46	301.844	106.19	391.74	189.891
PWY-5347	superpathway of L-methionine biosynthesis (transsulfuration)	Amino Acid Biosynthesis	Indoor	3.18374	0.000348575	1105	840.008	1143.47	885.444	936.034	883.009	1345.56	928.216	865.893	383.447	472.59	378.575	395.539	599.373	392.576	812.88	552.808	265.309
ASPASN-PWY	superpathway of L-aspartate and L-asparagine biosynthesis	Amino Acid Biosynthesis	Outdoor	2.61887	0.00541053	1322.06	1112.5	1355.22	1644.93	1567.81	1534.54	1445.1	1164.65	1434.72	1335.23	893.313	1575.41	2098.72	1847.8	1441.63	3032.15	2111.64	1000.32
PWY-3001	superpathway of L-isoleucine biosynthesis I	Amino Acid Biosynthesis	Outdoor	2.19148	0.0469447	1727.62	1524.1	1688.78	1868	1854.83	1723.5	1882.51	1359.83	1677.54	1524.31	1054.05	1790.97	2351.97	2095.79	1591.75	3268.3	2321.27	1178.26
PWY-6151	S-adenosyl-L-methionine cycle I	Amino Acid Biosynthesis	Outdoor	2.8969	0.000674763	1023.72	973.132	971.147	1050.31	882.757	874.706	1356.08	841.876	775.664	1075.24	709.785	1291.17	1692.24	1525.97	1105.52	2398.47	1617.32	926.044
PWY-6628	superpathway of L-phenylalanine biosynthesis	Amino Acid Biosynthesis	Outdoor	2.71984	0.00803887	275.091	242.644	310.988	19.7828	369.617	273.161	439.192	190.117	0	0	484.208	463.366	504.348	485.611	480.427	731.814	471.353	329.136
PWY-6630	superpathway of L-tyrosine biosynthesis	Amino Acid Biosynthesis	Outdoor	2.68682	0.0133708	273.256	241.515	308.433	19.7793	367.875	272.141	435.101	188.752	0	0	473.062	451.303	488.33	464.733	456.922	692.884	459.108	314.97
THRESYN-PWY	superpathway of L-threonine biosynthesis	Amino Acid Biosynthesis	Outdoor	2.3511	0.0192834	1709.66	1532.32	1680.56	1813.73	1834.36	1694.81	1885.67	1354.14	1635.62	1514.5	1038.63	1787.59	2382.23	2095.29	1590.93	3298.07	2310.36	1199.38
TRPSYN-PWY	L-tryptophan biosynthesis	Amino Acid Biosynthesis	Outdoor	3.11841	0.000348575	845.594	666.61	828.378	1152.07	1071.36	1027.18	822.018	490.633	946.869	1184.3	684.855	1389.69	1863.43	1593.65	1301.23	2692.37	1667.36	915.609
ARGORNPROST-PWY	arginine, ornithine and proline interconversion	Amino Acid Degradation	Indoor	2.72912	0.000133114	24.1192	56.2209	31.35	37.2109	28.7279	24.7401	24.5957	19.0431	26.0681	0	0	0	0	0	0	0	0	0
PWY-5655	L-tryptophan degradation IX	Amino Acid Degradation	Indoor	2.56937	0.0290838	0	0	5.95953	7.36047	0	6.77853	0	8.97494	0	0	0	0	0	0	0	0	0	0
HISDEG-PWY	L-histidine degradation I	Amino Acid Degradation	Outdoor	2.85384	0.0192834	532.015	549.967	452.046	775.205	873.381	815.018	163.709	416.301	769.351	547.744	384.484	893.99	1232.75	1282.25	815.746	2073.99	1021	526.5
PWY0-781	aspartate superpathway	aspartate superpathway	Indoor	2.98984	0.000348575	823.325	744.397	839.952	724.846	751.329	622.11	1020.93	573.494	609.783	359.804	354.753	411.147	427.494	425.034	350.58	547.839	489.433	257.193
P42-PWY	incomplete reductive TCA cycle	C1 Compound Utilization and Assimilation	Indoor	2.63793	0.0118489	2115.34	1758.62	1937.32	2193.02	2238.93	2067.29	1969.49	1506.1	1860.96	1510.66	1244.5	1877.98	2493.88	2231.22	1614.47	3394.96	2218.27	1146.64
CALVIN-PWY	Calvin-Benson-Bassham cycle	C1 Compound Utilization and Assimilation	Outdoor	2.65065	0.000486766	1374.89	1336.73	1318.69	1741.93	1512.13	1474.07	1645.1	1088.43	1390.83	1389.09	981.071	1693.9	2079.19	1888.07	1475.49	2876.94	2044.71	1101.82
CODH-PWY	reductive acetyl coenzyme A pathway	C1 Compound Utilization and Assimilation	Outdoor	2.24988	0.000483278	0	0	0	0	0	0	0	0	0	22.7779	9.93606	89.9044	53.2221	45.3627	40.3445	131.725	0	38.2053
COLANSYN-PWY	colanic acid building blocks biosynthesis	Carbohydrate Biosynthesis	Indoor	2.30801	0.0243409	981.635	844.26	955.529	1160.22	1069.48	964.679	949.576	782.333	908.278	624.275	575.712	981.393	1208.87	960.691	789.698	1585.3	1175.37	686.305
DTDPRHAMSYN-PWY	dTDP-L-rhamnose biosynthesis I	Carbohydrate Biosynthesis	Indoor	3.01639	0.00541053	1822.95	1603.67	1655.47	2323.84	2238.4	2122.91	1315.53	1520.42	2141.35	1247.98	929.743	1595.9	1869.13	1818.14	1435.55	2792.86	1936.2	1004.22
GLUCONEO-PWY	gluconeogenesis I	Carbohydrate Biosynthesis	Indoor	2.3568	0.0192834	1654.43	1429.83	1584.71	1817.42	1843.96	1706.75	1623.07	1298.08	1647.14	1334.18	952.853	1563.73	2058.83	1900.27	1434.76	2902.87	1958.64	1039.23
PWY-6478	GDP-D-glycero-&alpha;-D-manno-heptose biosynthesis	Carbohydrate Biosynthesis	Indoor	2.55912	0.00230372	296.873	167.05	225.417	198.668	156.524	129.651	364.325	70.9245	71.6614	27.6619	66.5593	66.7888	132.487	37.9497	0	0	23.0885	65.9266
PWY-6749	CMP-legionaminate biosynthesis I	Carbohydrate Biosynthesis	Indoor	2.52965	0.0305102	243.318	207.552	225.475	575.757	326.017	366.983	450.89	315.448	386.605	122.195	200.419	342.268	198.209	210.124	155.358	248.959	411.834	246.493
PWY-7031	protein N-glycosylation (bacterial)	Carbohydrate Biosynthesis	Indoor	2.47057	0.00230372	235.124	131.999	171.73	159.65	113.461	94.9091	292.356	47.0143	52.2078	20	42	40	91	22	0	0	13	42
PWY-7090	UDP-2,3-diacetamido-2,3-dideoxy-&alpha;-D-mannuronate biosynthesis	Carbohydrate Biosynthesis	Indoor	2.47614	0.00126108	240.037	140.491	179.022	160.097	113.368	94.2724	295.874	55.6119	58.0425	21.2121	42	44.4751	100.042	24.349	0	0	17.5547	49.0319
PWY-7328	superpathway of UDP-glucose-derived O-antigen building blocks biosynthesis	Carbohydrate Biosynthesis	Indoor	2.83152	0.000483497	453.87	366.38	357.849	418.444	307.907	265.841	539.776	119.8	149.867	47.298	94.3466	93.9171	201.721	52.8052	0	0	31.9342	95.9682
PWY-7332	superpathway of UDP-N-acetylglucosamine-derived O-antigen building blocks biosynthesis	Carbohydrate Biosynthesis	Indoor	2.91871	0.000348575	595.491	511.975	560.201	578.005	445.93	385.144	825.935	323.071	325.296	115.551	193.307	216.641	437.732	128.376	114.746	0	212.033	231.045
PWY0-1241	ADP-L-glycero-&beta;-D-manno-heptose biosynthesis	Carbohydrate Biosynthesis	Indoor	2.35936	0.0305102	315.758	204.905	249.273	192.669	204.661	164.066	417.733	94.875	73.5917	32.9498	145.172	162.795	205.644	118.643	107.727	124.063	87.5554	125.341
UDPNAGSYN-PWY	UDP-N-acetyl-D-glucosamine biosynthesis I	Carbohydrate Biosynthesis	Indoor	2.61971	0.00707665	786.261	777.513	808.909	949.921	782.125	698.791	1159.84	623.147	710.843	592.384	464.56	782.598	874.205	601.58	508.919	942.194	928.696	516.466
PWY-1269	CMP-3-deoxy-D-manno-octulosonate biosynthesis I	Carbohydrate Biosynthesis	Outdoor	2.49774	0.0305102	1179.98	898.786	1044.15	1128.05	1254.81	1157.52	890.495	822.936	1013.41	907.5	734.5	1132.71	1584.23	1517.75	1102.66	2352.75	1377.65	755.714
PWY-5659	GDP-mannose biosynthesis	Carbohydrate Biosynthesis	Outdoor	2.86628	0.000348575	1186.92	1049.63	1146.54	1274.41	1415.59	1295.3	960.473	954.162	1200.26	1202.6	839.167	1408.46	1929.34	1831.94	1355.16	2879.73	1818.54	939.879
PWY-7323	superpathway of GDP-mannose-derived O-antigen building blocks biosynthesis	Carbohydrate Biosynthesis	Outdoor	2.72715	0.00172014	1095.03	856.115	1039.46	1203.46	1282.61	1207.92	811.934	849.364	1075.08	1030.51	681.989	1234.76	1701.72	1600.78	1196.65	2559.61	1534.14	821.731
PWY-5384	sucrose degradation IV (sucrose phosphorylase)	Carbohydrate Degradation	Indoor	2.6711	0.0118489	357.78	394.195	279.815	664.964	364.446	430.362	473.549	403.852	479.174	281.178	221.569	379.612	209.306	230.59	166.995	268.959	454.742	267.873
PWY-621	sucrose degradation III (sucrose invertase)	Carbohydrate Degradation	Indoor	2.71679	0.0243409	394.141	532.018	422.138	762.689	433.002	494.468	702.117	480.205	604.775	375.189	274.306	512.526	238.068	323.775	268.389	342.561	454.742	441.09
PWY-6317	galactose degradation I (Leloir pathway)	Carbohydrate Degradation	Indoor	3.04578	0.000928533	868.433	1007.79	915.656	1447.35	1351.4	1296.42	1278.03	885.63	1246.97	693.231	449.385	939.107	906.977	745.864	604.312	989.816	1009.9	696.19
PWY-6901	superpathway of glucose and xylose degradation	Carbohydrate Degradation	Indoor	2.90369	0.0118489	734.514	609.772	726.155	811.414	857.873	843.096	432.583	661.305	734.023	356.048	523.228	423.594	673.05	519.196	340.651	695.411	476.474	242.476
RHAMCAT-PWY	L-rhamnose degradation I	Carbohydrate Degradation	Outdoor	2.99865	0.000928533	573.013	534.339	498.66	808.582	880.607	830.911	173.808	440.054	787.271	800.866	470.759	963.025	1303.37	1281.98	967.696	2155.8	1215.14	659.705
PWY0-1586	peptidoglycan maturation (meso-diaminopimelate containing)	Cell Structure Biosynthesis	Indoor	3.3381	0.000486766	1277.52	977.91	1256.85	1483.43	1420.88	1376.65	868.377	1119.67	1422.28	550.846	512.324	462.831	571.342	488.215	390.111	674.909	619.445	197.739
TEICHOICACID-PWY	teichoic acid (poly-glycerol) biosynthesis	Cell Structure Biosynthesis	Indoor	2.11477	0.0227205	14.2929	36.3384	27.5853	23.6388	30.1601	0	0	25.7067	20.8686	0	0	0	0	0	0	0	0	29.1482
NAGLIPASYN-PWY	lipid IVA biosynthesis	Cell Structure Biosynthesis	Outdoor	2.60993	0.0151694	1241.04	967.897	1098.26	1185.02	1300.86	1208.99	933.672	887.279	1069.91	997.943	750.577	1207.95	1718.9	1635.21	1190.88	2548.95	1507.47	813.451
BIOTIN-BIOSYNTHESIS-PWY	biotin biosynthesis I	Cofactor, Prosthetic Group, Electron Carrier, and Vitamin Biosynthesis	Indoor	3.11766	0.000182481	340.809	777.023	295.85	520.777	600.124	659.827	539.419	310.607	336.804	0	0	17.8146	0	0	0	0	0	0
HEMESYN2-PWY	heme biosynthesis II (anaerobic)	Cofactor, Prosthetic Group, Electron Carrier, and Vitamin Biosynthesis	Indoor	2.73437	0.000348575	404.995	369.678	304.045	340.538	293.686	259.569	528.903	139.783	160.987	62.616	94.6238	152.879	215.711	79.6483	60.311	76.3247	74.7464	116.578
PWY-5855	ubiquinol-7 biosynthesis (prokaryotic)	Cofactor, Prosthetic Group, Electron Carrier, and Vitamin Biosynthesis	Indoor	2.17897	0.00423983	8.688	26.8723	18.2055	4.95089	0	7.04443	19.6235	14.0816	0	0	0	6.33377	0	0	0	0	0	0
PWY-5856	ubiquinol-9 biosynthesis (prokaryotic)	Cofactor, Prosthetic Group, Electron Carrier, and Vitamin Biosynthesis	Indoor	2.17988	0.00423983	8.688	26.8723	18.2055	4.95089	0	7.04443	19.6235	14.0816	0	0	0	6.33377	0	0	0	0	0	0
PWY-5857	ubiquinol-10 biosynthesis (prokaryotic)	Cofactor, Prosthetic Group, Electron Carrier, and Vitamin Biosynthesis	Indoor	2.18179	0.00423983	8.688	26.8723	18.2055	4.95089	0	7.04443	19.6235	14.0816	0	0	0	6.33377	0	0	0	0	0	0
PWY-6263	superpathway of menaquinol-8 biosynthesis II	Cofactor, Prosthetic Group, Electron Carrier, and Vitamin Biosynthesis	Indoor	2.78641	0.00231581	716.083	671.543	590.884	361.359	531.104	337.417	655.625	336.677	417.905	266.337	304.198	278.856	372.581	396.859	176.647	320.113	266.229	225.227
PWY-6519	8-amino-7-oxononanoate biosynthesis I	Cofactor, Prosthetic Group, Electron Carrier, and Vitamin Biosynthesis	Indoor	3.08634	0.000182481	290.541	755.773	251.057	500.459	573.118	648.917	472.194	271.987	309.928	0	0	14.0463	0	0	0	0	0	0
PWY-6708	ubiquinol-8 biosynthesis (prokaryotic)	Cofactor, Prosthetic Group, Electron Carrier, and Vitamin Biosynthesis	Indoor	2.18041	0.00423983	8.688	26.8723	18.2055	4.95089	0	7.04443	19.6235	14.0816	0	0	0	6.33377	0	0	0	0	0	0
PWY-7371	1,4-dihydroxy-6-naphthoate biosynthesis II	Cofactor, Prosthetic Group, Electron Carrier, and Vitamin Biosynthesis	Indoor	2.57038	0.00707665	426.5	419	304	152	253	142	362	147.5	190	116.59	152	119.379	157.899	174.709	70.3288	127.935	104	99.7268
PWY-7373	superpathway of demethylmenaquinol-6 biosynthesis II	Cofactor, Prosthetic Group, Electron Carrier, and Vitamin Biosynthesis	Indoor	2.58662	0.00126108	352.02	262.736	253.396	152	189.421	124.078	341.189	95.0613	111.765	52.8184	91.8561	79.7924	133.385	63.8712	0	0	37.8182	74.2229
UBISYN-PWY	superpathway of ubiquinol-8 biosynthesis (prokaryotic)	Cofactor, Prosthetic Group, Electron Carrier, and Vitamin Biosynthesis	Indoor	2.18917	0.00423983	8.34728	25.8527	17.5218	4.76054	0	6.7793	18.8743	13.5733	0	0	0	6.09485	0	0	0	0	0	0
1CMET2-PWY	N10-formyl-tetrahydrofolate biosynthesis	Cofactor, Prosthetic Group, Electron Carrier, and Vitamin Biosynthesis	Outdoor	2.38981	0.0379772	1324.78	1205.97	1336.35	1483.31	1544.32	1419.03	1383.6	1109.73	1413.4	1296.02	852.158	1424.68	1911.23	1777.72	1342.17	2723.72	1928.66	959.492
COBALSYN-PWY	adenosylcobalamin salvage from cobinamide I	Cofactor, Prosthetic Group, Electron Carrier, and Vitamin Biosynthesis	Outdoor	3.33013	0.000348575	498.49	640.779	565.484	856.257	641.609	677.845	967.609	516.832	684.298	1199.85	808.202	1487.05	1843.14	1672.47	1325.55	2799.13	2076.39	1024.82
FOLSYN-PWY	superpathway of tetrahydrofolate biosynthesis and salvage	Cofactor, Prosthetic Group, Electron Carrier, and Vitamin Biosynthesis	Outdoor	3.34555	0.000348575	298.543	796.466	338.322	597.674	826.774	757.58	540.259	490.425	481.409	1204.74	827.803	1369.21	1851.02	1742.5	1308.52	2665.55	1769.21	923.481
HEME-BIOSYNTHESIS-II	heme biosynthesis I (aerobic)	Cofactor, Prosthetic Group, Electron Carrier, and Vitamin Biosynthesis	Outdoor	2.21896	0.0469447	28.7583	68.0642	30.006	28.4557	27.2689	25.0843	24.3247	46.2879	33.7365	43.7902	55.4215	72.3604	94.7085	65.2027	49.1387	60.0555	34.3373	32.3921
PANTO-PWY	phosphopantothenate biosynthesis I	Cofactor, Prosthetic Group, Electron Carrier, and Vitamin Biosynthesis	Outdoor	2.74102	0.000928533	1346.46	1153.35	1230.54	1281.08	1430.16	1304.26	1232.5	949.299	1210.54	1312.76	844.39	1359.3	1931.33	1851.08	1347.94	2771.21	1792.79	935.014
PANTOSYN-PWY	pantothenate and coenzyme A biosynthesis I	Cofactor, Prosthetic Group, Electron Carrier, and Vitamin Biosynthesis	Outdoor	2.53747	0.00410705	1418.09	1226.13	1330.05	1430.7	1522.42	1393.78	1351.11	1049.83	1324.47	1309.14	879.993	1417.25	1958.74	1836.46	1357.63	2770.75	1861.73	970.167
PWY-5005	biotin biosynthesis II	Cofactor, Prosthetic Group, Electron Carrier, and Vitamin Biosynthesis	Outdoor	2.33844	0.00695917	75.7662	66.6231	84.1835	0	104.143	70.4393	128.069	46.2951	0	0	185.868	137.935	151.671	150.92	158.899	227.555	137.747	105.841
PWY-5509	adenosylcobalamin biosynthesis from cobyrinate a,c-diamide I	Cofactor, Prosthetic Group, Electron Carrier, and Vitamin Biosynthesis	Outdoor	3.33362	0.000348575	477.543	622.682	522.392	816.538	603.233	642.923	867.751	490.569	642.113	1164.55	781.792	1451.15	1805.36	1637.73	1303.78	2766.96	1999.68	1000.77
PWY-5920	superpathway of heme biosynthesis from glycine	Cofactor, Prosthetic Group, Electron Carrier, and Vitamin Biosynthesis	Outdoor	2.20772	0.0119228	0	0	0	0	0	0	0	0	0	0	0	9.71853	39.4734	0	46.6423	0	35.5252	29.145
PWY-6147	6-hydroxymethyl-dihydropterin diphosphate biosynthesis I	Cofactor, Prosthetic Group, Electron Carrier, and Vitamin Biosynthesis	Outdoor	2.67844	0.00231581	1244.38	988.245	1166.69	1193.01	1331.32	1228.63	1124.57	908.3	1134.75	1114.99	755.626	1295.1	1760.88	1719.4	1273.61	2622.57	1600.23	885.826
PWY-6269	adenosylcobalamin salvage from cobinamide II	Cofactor, Prosthetic Group, Electron Carrier, and Vitamin Biosynthesis	Outdoor	3.33709	0.000348575	473.993	625.404	518.288	806.812	595.297	634.727	870.16	487.498	634.236	1164.3	784.144	1451.47	1806.84	1639.86	1304.65	2770.64	2002.29	1003.02
PWY-6612	superpathway of tetrahydrofolate biosynthesis	Cofactor, Prosthetic Group, Electron Carrier, and Vitamin Biosynthesis	Outdoor	3.36861	0.000348575	210.022	631.698	240.288	439.925	634.368	579.924	398.075	366.111	350.378	1122.71	734.516	1249.3	1717.31	1639.17	1224.88	2529.79	1629.43	861.991
PWY-6892	thiazole biosynthesis I (E. coli)	Cofactor, Prosthetic Group, Electron Carrier, and Vitamin Biosynthesis	Outdoor	3.13977	0.000348575	1060.56	1066.94	1011.16	769.562	908.914	843.969	1330.23	734.018	662.692	1183.37	841.342	1396.44	1991.34	1697.86	1286.38	2843.95	1789	981.964
PWY-6897	thiamin salvage II	Cofactor, Prosthetic Group, Electron Carrier, and Vitamin Biosynthesis	Outdoor	3.09523	0.000348575	1144.36	1114.08	1138.33	866.9	1067.69	950.82	1112.99	923.144	812.838	1252.15	923.196	1419.44	2001.04	1879.89	1377.2	2979.45	1804.9	908.147
PWY-7374	1,4-dihydroxy-6-naphthoate biosynthesis I	Cofactor, Prosthetic Group, Electron Carrier, and Vitamin Biosynthesis	Outdoor	2.21034	0.00695917	0	42.2758	30.541	0	74.1694	0	41.8766	61.7703	27.4038	89.2311	115.564	77.2391	90.8504	122.429	48.4201	93.0192	83.871	37.6942
PWY-7539	6-hydroxymethyl-dihydropterin diphosphate biosynthesis III (Chlamydia)	Cofactor, Prosthetic Group, Electron Carrier, and Vitamin Biosynthesis	Outdoor	2.56427	0.0151694	1301.32	1046.47	1207.6	1249.51	1388.21	1284.21	1193.41	930.267	1163.63	1123.17	771.78	1301.44	1790.57	1723.33	1264.89	2634.66	1604.14	889.536
PYRIDNUCSAL-PWY	NAD salvage pathway I	Cofactor, Prosthetic Group, Electron Carrier, and Vitamin Biosynthesis	Outdoor	3.40854	0.000348575	350.826	683.99	399.214	355.105	415.771	453.186	728.081	213.636	422.516	1250.03	736.161	1370.85	1814.18	1703.28	1289.76	2632.62	1808.34	926.148
THISYN-PWY	superpathway of thiamin diphosphate biosynthesis I	Cofactor, Prosthetic Group, Electron Carrier, and Vitamin Biosynthesis	Outdoor	3.0338	0.000348575	1313.4	1190.26	1214.08	991.518	1173.49	1050.54	1221.7	943.497	848.189	1249.88	936.411	1455.88	2051.85	1890.37	1383.97	3027.94	1832.04	953.778
FASYN-INITIAL-PWY	superpathway of fatty acid biosynthesis initiation (E. coli)	Fatty Acid and Lipid Biosynthesis	Indoor	2.9073	0.000182481	152.983	598.413	131.059	329.323	393.998	480.499	272.198	150.587	190.416	0	0	6.41192	0	0	0	0	0	0
PHOSLIPSYN-PWY	superpathway of phospholipid biosynthesis I (bacteria)	Fatty Acid and Lipid Biosynthesis	Indoor	2.71175	0.000348575	1612.7	1417.65	1530.1	1762.57	1756.93	1618.81	1661.66	1250.73	1584.37	1250.86	929.82	1485.85	1826.08	1634.14	1267.45	2354.19	1839.75	981.637
PWY-5667	CDP-diacylglycerol biosynthesis I	Fatty Acid and Lipid Biosynthesis	Indoor	2.70086	0.000348575	1741.92	1569.06	1714.69	2047.14	1938.49	1791.94	1933.13	1412.65	1816.65	1385.92	996.037	1638	2088.53	1891.06	1443.16	2893.74	2113.34	1102.82
PWY-5971	palmitate biosynthesis II (bacteria and plants)	Fatty Acid and Lipid Biosynthesis	Indoor	3.08069	0.000133114	238.479	843.779	229.641	523.626	620.566	594.335	412.457	260.501	320.725	0	0	0	0	0	0	0	0	0
PWY-5989	stearate biosynthesis II (bacteria and plants)	Fatty Acid and Lipid Biosynthesis	Indoor	2.98565	0.000182481	183.322	712.013	156.853	393.63	476.696	584.485	318.682	180.337	229.488	0	0	7.69392	0	0	0	0	0	0
PWY-6282	palmitoleate biosynthesis I (from (5Z)-dodec-5-enoate)	Fatty Acid and Lipid Biosynthesis	Indoor	2.98181	0.000182481	182.471	704.431	156.328	391.239	470.939	575.205	319.586	179.387	228.239	0	0	7.69244	0	0	0	0	0	0
PWY-7664	oleate biosynthesis IV (anaerobic)	Fatty Acid and Lipid Biosynthesis	Indoor	3.03166	0.000182481	209.264	770.295	179.698	442.516	529.125	638.693	362.668	205.127	260.863	0	0	8.96831	0	0	0	0	0	0
PWY0-1319	CDP-diacylglycerol biosynthesis II	Fatty Acid and Lipid Biosynthesis	Indoor	2.70086	0.000348575	1741.92	1569.06	1714.69	2047.14	1938.49	1791.94	1933.13	1412.65	1816.65	1385.92	996.037	1638	2088.53	1891.06	1443.16	2893.74	2113.34	1102.82
PWY0-862	(5Z)-dodec-5-enoate biosynthesis	Fatty Acid and Lipid Biosynthesis	Indoor	2.97823	0.000182481	181.814	694.591	155.86	388.302	466.87	568.762	317.985	178.622	227.008	0	0	7.69056	0	0	0	0	0	0
PWY4FS-7	phosphatidylglycerol biosynthesis I (plastidic)	Fatty Acid and Lipid Biosynthesis	Indoor	2.65207	0.0243409	1062.62	1018.51	1103.08	1309.26	1051.44	964.302	1519.42	845.694	1061.36	892.972	711.254	1082.31	1271.12	911.774	744.528	1356.92	1323.61	661.487
PWY4FS-8	phosphatidylglycerol biosynthesis II (non-plastidic)	Fatty Acid and Lipid Biosynthesis	Indoor	2.65207	0.0243409	1062.62	1018.51	1103.08	1309.26	1051.44	964.302	1519.42	845.694	1061.36	892.972	711.254	1082.31	1271.12	911.774	744.528	1356.92	1323.61	661.487
PWYG-321	mycolate biosynthesis	Fatty Acid and Lipid Biosynthesis	Indoor	3.02987	0.000182481	210.279	771.46	179.997	442.649	525.492	630.415	356.38	206.547	261.412	0	0	9.31617	0	0	0	0	0	0
FASYN-ELONG-PWY	fatty acid elongation -- saturated	Fatty Acid and Lipid Biosynthesis	Outdoor	2.53588	0.0243409	1675.28	1539.05	1599.3	1877.67	1909.43	1751.31	1533.72	1342.54	1683.73	1531.23	1039.49	1754.07	2394.39	2227.89	1642.12	3459.92	2270.21	1225.23
PWY-5973	cis-vaccenate biosynthesis	Fatty Acid and Lipid Biosynthesis	Outdoor	2.29595	0.0379772	1786.68	1715.9	1755.25	2076.2	2037.75	1880.6	1904.08	1482.23	1868.13	1658.31	1145.79	1926.07	2520.15	2282.31	1734.76	3533.14	2520.43	1314.76
PWY-7663	gondoate biosynthesis (anaerobic)	Fatty Acid and Lipid Biosynthesis	Outdoor	2.37505	0.0305102	1855.65	1852.73	1835.97	2203.97	2168.73	2002.91	1986.19	1557.44	1960.28	1772.56	1197.89	2033.9	2668.88	2430.68	1834.35	3771.64	2667.19	1408.98
ANAEROFRUCAT-PWY	homolactic fermentation	Fermentation	Indoor	2.92621	0.000928533	1048.08	1152.26	1135.19	1398.46	1256.22	1144.55	1271.87	960.147	1168.5	832.707	722.229	877.559	1166.64	1101.74	779.176	1474.83	976.509	568.411
CENTFERM-PWY	pyruvate fermentation to butanoate	Fermentation	Indoor	2.00457	0.0236102	47.5997	110.862	54.6752	52.372	46.5073	47.9915	40.4139	87.5519	59.7244	0	0	17.5414	40.3739	0	61.8423	0	77.8509	32.5971
FERMENTATION-PWY	mixed acid fermentation	Fermentation	Indoor	2.81579	0.00309519	658.853	645.247	760.114	1115.54	844.977	782.91	1019.45	733.281	924.336	426.604	418.671	765.635	626.552	578.657	549.458	871.927	837.402	564.489
P161-PWY	acetylene degradation	Fermentation	Indoor	2.61838	0.0243409	351.019	396.767	478.807	735.767	507.596	469.438	757.556	482.368	586.899	255.121	261.562	489.905	366.1	335.831	335.987	508.682	628.986	385.174
P461-PWY	hexitol fermentation to lactate, formate, ethanol and acetate	Fermentation	Indoor	2.28771	0.00307989	34.755	158.064	86.3867	72.2372	121.616	61.1042	138.735	103.156	59.4441	33.8165	13.9497	10.2641	31.8718	24.9158	0	81.4208	0	73.8062
PWY-6590	superpathway of Clostridium acetobutylicum acidogenic fermentation	Fermentation	Indoor	2.077	0.0236102	60.5452	138.897	69.4683	66.5904	59.1709	60.9825	51.6048	110.005	75.6456	0	0	22.4825	51.6269	0	78.5147	0	99.0113	41.5567
PWY-5088	L-glutamate degradation VIII (to propanoate)	Fermentation	Outdoor	2.39877	0.00451429	0	0	0	0	0	0	0	0	0	10.6763	0	20.2557	5.26902	8.56248	11.5947	69.7646	0	0
PWY-5100	pyruvate fermentation to acetate and lactate II	Fermentation	Outdoor	2.86561	0.00541053	1342.98	1250.58	1374.73	1386.3	1303.34	1195.65	1868.78	1092.26	1148.27	1381.01	1021.99	1690.48	2142.61	1867.05	1399.39	2927.93	2045	1107.44
PWY-5676	acetyl-CoA fermentation to butanoate II	Fermentation	Outdoor	2.43663	0.0192834	196.599	245.998	302.954	298.746	298.466	261.486	433.725	257.894	227.961	417.196	201.07	345.619	539.53	450.932	267.934	570.264	721.528	186.288
PWY-6588	pyruvate fermentation to acetone	Fermentation	Outdoor	2.76787	0.00126843	48.9279	7.94037	173.066	152.814	195.056	154.631	252.24	139.567	71.8625	603.215	158.969	274.647	561.593	408.526	219.799	502.374	629.751	123.083
PWY-7111	pyruvate fermentation to isobutanol (engineered)	Fermentation	Outdoor	2.38553	0.00707665	1768.46	1522.62	1714.84	1947.77	1902.84	1787.71	1980.82	1367.57	1743.82	1625.28	1140.35	1858.57	2369.99	2118.24	1651.47	3331.94	2489.69	1254.9
GLYCOLYSIS	glycolysis I (from glucose 6-phosphate)	Glycolysis	Indoor	2.9501	0.00309519	1424.28	1413.36	1392.63	1697.79	1541.29	1465.14	1522.17	1153.89	1419.48	1052.68	943.65	1112.93	1516.64	1484.22	1024.14	1980.37	1252.7	710.668
PWY-5484	glycolysis II (from fructose 6-phosphate)	Glycolysis	Indoor	3.15409	0.000486766	1339.14	1330.41	1308.72	1600.26	1484.04	1402.93	1277.39	1098.85	1349.93	797.53	836.853	806.357	1126.47	1149.75	749.754	1426.76	855.445	503.433
PWY-4984	urea cycle	Inorganic Nutrient Metabolism	Indoor	2.75895	0.000674763	439.651	334.894	366.34	311.678	252.723	206.227	574.115	161.862	151.385	48.1439	93.3582	93.2015	224.861	52.7429	47.7035	0	87.4667	113.627
PWY490-3	nitrate reduction VI (assimilatory)	Inorganic Nutrient Metabolism	Indoor	2.53484	0.0305102	208.817	174.525	190.426	567.072	292.66	347.89	401.37	301.518	364.155	99.2717	180.441	309.516	162.902	181.494	131.457	208.994	371.826	225.868
PPGPPMET-PWY	ppGpp biosynthesis	Metabolic Regulator Biosynthesis	Indoor	2.77323	0.00171068	481.985	275.384	368.675	324.985	242.421	205.623	596.406	113.922	116.591	48.8301	98.6391	100.678	207.494	53.468	0	0	32.0228	98.472
PWY-6700	queuosine biosynthesis	Nucleic Acid Processing	Outdoor	2.6831	0.00541053	1216.12	924.48	1137.24	1268.56	1369.63	1255.46	1114.99	999.764	1251.4	1131.1	792.498	1277.23	1870.25	1696.41	1253.41	2740.95	1695.92	894.203
PWY-6121	5-aminoimidazole ribonucleotide biosynthesis I	Nucleoside and Nucleotide Biosynthesis	Indoor	2.28835	0.00309519	1857.8	1627.5	1803.52	2001.32	1979.87	1827.76	1997.92	1469.1	1772.39	1489.2	1113.24	1802.3	2352.48	2094.01	1599.41	3194.24	2281.86	1179.81
PWY-7220	adenosine deoxyribonucleotides de novo biosynthesis II	Nucleoside and Nucleotide Biosynthesis	Indoor	2.5511	0.0192834	1609.17	1535.94	1610.89	2183.64	1919.77	1834.28	1906.95	1453.45	1838.5	1347.53	1015.2	1727.78	2107.13	1952.68	1473.95	2948.97	2226.85	1219.85
PWY-7221	guanosine ribonucleotides de novo biosynthesis	Nucleoside and Nucleotide Biosynthesis	Indoor	2.14901	0.00541053	1617.76	1467.64	1588.5	1806.75	1766.18	1625.18	1773.37	1290.82	1596.1	1356.39	969.166	1590.1	2091.06	1866.7	1421.19	2869.89	2066.33	1081.91
PWY-7222	guanosine deoxyribonucleotides de novo biosynthesis II	Nucleoside and Nucleotide Biosynthesis	Indoor	2.5511	0.0192834	1609.17	1535.94	1610.89	2183.64	1919.77	1834.28	1906.95	1453.45	1838.5	1347.53	1015.2	1727.78	2107.13	1952.68	1473.95	2948.97	2226.85	1219.85
PWY-7234	inosine-5'-phosphate biosynthesis III	Nucleoside and Nucleotide Biosynthesis	Indoor	3.25143	0.00172014	911.977	787.276	849.346	1179.14	1231.21	1101.08	323.872	758.476	1131.08	270.617	264.664	333.546	211.018	324.554	309.796	282.239	313.073	220.989
DENOVOPURINE2-PWY	superpathway of purine nucleotides de novo biosynthesis II	Nucleoside and Nucleotide Biosynthesis	Outdoor	3.17819	0.000348575	1005.82	1025.07	927.897	1018.79	1108.74	959.001	1211.59	718.112	733.107	1237.15	799.626	1515.77	2019.91	1830.83	1385.62	2926.32	1969.2	1087.25
PWY-6123	inosine-5'-phosphate biosynthesis I	Nucleoside and Nucleotide Biosynthesis	Outdoor	2.74491	0.000348575	1566.45	1432.16	1524.38	1747.01	1740.04	1612.96	1716.55	1260.58	1555.54	1499.86	1084.16	1790.22	2347.67	2120.67	1622.27	3309.93	2336.81	1188.84
PWY-6125	superpathway of guanosine nucleotides de novo biosynthesis II	Nucleoside and Nucleotide Biosynthesis	Outdoor	3.23607	0.000348575	742.298	830.684	668.041	691.442	787.677	660.55	975.003	491.722	452.304	1065.1	661.182	1316.18	1767.6	1610.08	1211.94	2600.62	1711.21	978.095
PWY-6545	pyrimidine deoxyribonucleotides de novo biosynthesis III	Nucleoside and Nucleotide Biosynthesis	Outdoor	2.66183	0.0192834	504.565	543.299	445.44	465.988	510.569	433.281	696.913	325.864	291.489	330.19	434.738	759.712	906.093	660.126	509.369	1011.17	841.698	533.694
PWY-7184	pyrimidine deoxyribonucleotides de novo biosynthesis I	Nucleoside and Nucleotide Biosynthesis	Outdoor	3.05158	0.000348575	537.824	616.224	479.168	484.873	567.233	467.87	714.092	347.868	310.432	732.989	506.925	980.628	1223.02	1051.73	792.374	1614.22	1228.26	665.446
PWY-7187	pyrimidine deoxyribonucleotides de novo biosynthesis II	Nucleoside and Nucleotide Biosynthesis	Outdoor	2.87074	0.000348575	741.577	782.813	691.135	730.578	812.141	692.617	912.82	531.4	515.3	810.015	599.261	1053.08	1290.57	1123.89	847.959	1712.38	1321.36	691.228
PWY-7196	superpathway of pyrimidine ribonucleosides salvage	Nucleoside and Nucleotide Biosynthesis	Outdoor	3.35102	0.000348575	750.221	859.476	671.421	689.14	799.589	666.372	990.211	495.176	445.141	1225.73	727.305	1511.21	2013.86	1866.98	1406.27	3054.86	1977.08	1123.07
PWY-7197	pyrimidine deoxyribonucleotide phosphorylation	Nucleoside and Nucleotide Biosynthesis	Outdoor	3.21122	0.000348575	503.431	581.254	445.617	459.154	540.224	443.239	679.042	323.067	289.122	807.093	476.89	1020.85	1413.51	1314.18	982.621	2251.33	1333.61	821.346
PWY-7200	superpathway of pyrimidine deoxyribonucleoside salvage	Nucleoside and Nucleotide Biosynthesis	Outdoor	3.01005	0.000348575	677.017	732.534	605.867	648.868	737.316	622.728	815.529	459.056	433.857	822.537	571.152	1065.47	1320.79	1180.55	887.15	1832.95	1336.96	725.051
PWY-7211	superpathway of pyrimidine deoxyribonucleotides de novo biosynthesis	Nucleoside and Nucleotide Biosynthesis	Outdoor	2.78618	0.00410705	719.784	774.877	644.581	670.587	765.385	641.281	859.221	472.668	447.118	888.36	607.835	853.212	1054.12	912.168	858.874	1210.78	1232.81	654.257
PWY-7228	superpathway of guanosine nucleotides de novo biosynthesis I	Nucleoside and Nucleotide Biosynthesis	Outdoor	3.24665	0.000348575	684.872	774.788	611.073	622.455	718.715	597.758	905.866	443.452	402.155	1022.5	621.882	1257.62	1726.78	1562.63	1173.92	2544.08	1644.67	948.54
PWY-841	superpathway of purine nucleotides de novo biosynthesis I	Nucleoside and Nucleotide Biosynthesis	Outdoor	3.22944	0.000348575	951.33	1013.31	866.817	902.646	1007.53	858.875	1200.27	646.22	618.646	1233.09	795.801	1504.36	2030.1	1832.63	1385.6	2930.13	1957.02	1079.41
PWY0-162	superpathway of pyrimidine ribonucleotides de novo biosynthesis	Nucleoside and Nucleotide Biosynthesis	Outdoor	2.72845	0.00410705	1396.92	1121.14	1266.7	1586.31	1576.59	1430.99	1152.68	974.2	1429.1	1257.13	778.088	1519.59	2041.87	1854.88	1403.12	2987.61	1971.19	1104.25
PWY0-166	superpathway of pyrimidine deoxyribonucleotides de novo biosynthesis (E. coli)	Nucleoside and Nucleotide Biosynthesis	Outdoor	2.86186	0.000348575	749.578	788.68	696.744	734.857	815.672	694.717	920.781	532.883	516.321	806.305	596.79	1047.89	1296.05	1123.1	846.487	1709.81	1319.65	692.877
PWY0-1297	superpathway of purine deoxyribonucleosides degradation	Nucleoside and Nucleotide Degradation	Indoor	2.57207	0.0379772	369.979	352.433	472.575	732.601	528.609	509.403	755.775	441.236	602.845	252.74	288.691	518.836	371.502	366.961	356.568	530.934	638.576	388.572
PWY0-1298	superpathway of pyrimidine deoxyribonucleosides degradation	Nucleoside and Nucleotide Degradation	Indoor	2.58218	0.0469447	386.522	417.579	471.73	728.172	528.234	508.669	748.355	463.298	598.531	262.197	305.143	523.973	372.983	373.708	362.589	537.305	640.808	390.896
NONOXIPENT-PWY	pentose phosphate pathway (non-oxidative branch)	Pentose Phosphate Pathways	Indoor	2.43907	0.00707665	1790.06	1742.57	1769.15	2050.13	1939.91	1834.92	2046.31	1463.01	1829.69	1593.99	1056.67	1817.06	2254.87	2006.76	1569.7	3063.34	2331.74	1194.68
PENTOSE-P-PWY	pentose phosphate pathway	Pentose Phosphate Pathways	Indoor	3.01161	0.00172014	701.765	713.84	696.385	579.455	635.817	633.991	729.609	641.955	527.325	214.822	423.013	256.862	433.313	327.235	204.873	420.88	279.465	141.922
PWY-6737	starch degradation V	Polymeric Compound Degradation	Outdoor	2.90907	0.00231581	1663.15	1597.94	1687.92	2397.7	1856.85	1938.98	2073.1	1697.51	1869.5	1759.55	1261.05	2344.92	2818.23	2629.31	1961.49	4061.24	3024.21	1548.07
PWY-7456	mannan degradation	Polymeric Compound Degradation	Outdoor	3.08556	0.000348575	708.862	503.704	669.19	746.629	844.298	825.317	273.123	597.065	678.817	900.404	587.191	1056.65	1497.18	1427.97	1062.6	2364.53	1393.32	712.072
PWY-3781	aerobic respiration I (cytochrome c)	Respiration	Indoor	2.78164	0.00126843	559.32	565.647	446.71	407.869	344.852	283.383	603.187	338.763	282.394	77.9748	82.4276	187.966	366.934	103.891	240.692	88.4918	258.452	230.158
METH-ACETATE-PWY	methanogenesis from acetate	Respiration	Outdoor	2.21133	0.00155748	0	0	0	0	0	0	0	0	0	24.7535	19.803	40.0106	11.2042	18.1562	24.5155	180.301	0	0
PWY-5910	superpathway of geranylgeranyldiphosphate biosynthesis I (via mevalonate)	Secondary Metabolite Biosynthesis	Indoor	2.10031	0.00797156	16.1703	99.4905	63.0933	61.1487	80.5041	27.8032	40.3026	91.4209	53.0235	0	0	0	31.0801	0	0	75.9082	0	71.2169
PWY-922	mevalonate pathway I	Secondary Metabolite Biosynthesis	Indoor	2.00398	0.00797156	11.3567	71.2222	44.7448	43.2749	57.182	19.5683	28.4325	65.4431	37.5049	0	0	0	21.8569	0	0	53.5623	0	50.8993
PWY-6703	preQ0 biosynthesis	Secondary Metabolite Biosynthesis	Outdoor	3.07245	0.000348575	872.339	696.608	792.25	662.714	746.58	709.565	884.452	614.602	484.364	884.791	674.113	1123.62	1565.61	1469.31	1086.13	2351.05	1398.46	780.712
GLUCUROCAT-PWY	superpathway of &beta;-D-glucuronide and D-glucuronate degradation	Secondary Metabolite Degradation	Indoor	3.04731	0.00309519	548.048	266.387	529.271	1038.82	972.939	1019.56	274.617	471	888.297	235.427	258.944	552.585	327.414	247.204	355.35	307.522	232.732	124.726
PWY-7237	myo-, chiro- and scillo-inositol degradation	Secondary Metabolite Degradation	Indoor	3.07486	0.00172014	488.5	340	401	683	711	674	75	323.5	711	58	72	115	33	93	83	55	26	36
PWY0-1261	anhydromuropeptides recycling	Secondary Metabolite Degradation	Indoor	2.485	0.0369884	181.092	383.937	192.764	185.415	178.503	163.948	159.594	298.407	226.563	0	0	35.0888	152.019	0	218.215	0	281.037	126.266
PWY-6507	4-deoxy-L-threo-hex-4-enopyranuronate degradation	Secondary Metabolite Degradation	Outdoor	3.14903	0.000348575	444.841	398.989	434.042	986.085	933.823	983.608	194.842	402.777	806.022	976.755	649.667	1142.1	1604.85	1367.19	1092.32	2378.59	1492.13	707.194
PWY-7242	D-fructuronate degradation	Secondary Metabolite Degradation	Outdoor	3.05194	0.000928533	540.978	478.118	527.891	1021.41	969.774	1011.2	388.266	469.6	867.911	1004.97	568.022	1111.81	1551.96	1335.62	1073.29	2308.14	1432.55	720.444
FUC-RHAMCAT-PWY	superpathway of fucose and rhamnose degradation	superpathway of fucose and rhamnose degradation	Indoor	2.1635	0.018262	0	0	6.30512	8.8729	64.9484	35.5073	22.4651	25.6559	0	0	0	19.512	0	0	0	0	0	0
GLYCOLYSIS-E-D	superpathway of glycolysis and Entner-Doudoroff	superpathway of glycolysis and the Entner-Doudoroff pathway	Indoor	2.80108	0.00707665	714.56	567.356	667.806	583.367	644.469	539.741	816.414	371.752	302.414	175.401	413.507	389.422	558.308	375.426	258.186	512.378	293.553	240.172
GALACT-GLUCUROCAT-PWY	superpathway of hexuronide and hexuronate degradation	superpathway of hexuronide and hexuronate degradation	Indoor	2.94769	0.0151694	447.945	258.298	447.791	932.765	868.931	913.418	235.433	399.289	784.248	242.557	289.697	486.973	361.525	268.527	330.753	327.25	245.691	120.557
MET-SAM-PWY	superpathway of S-adenosyl-L-methionine biosynthesis	superpathway of S-adenosyl-L-methionine biosynthesis	Indoor	3.1588	0.000348575	952.023	689.322	998.596	723.038	771.023	728.614	1181.33	814.212	719.857	276.835	366.664	270.796	277.678	436.479	282.095	584.85	396.835	190.192
PWY-5913	TCA cycle VI (obligate autotrophs)	TCA cycle	Indoor	2.55317	0.00918974	426.712	268.635	345.307	316.652	233.392	196.592	512.565	115.825	123.323	76.6291	81.5652	224.753	207.63	119.628	171.527	174.927	94.6417	140.986
PWY-7254	TCA cycle VII (acetate-producers)	TCA cycle	Indoor	2.55798	0.0305102	469.906	299.728	379.893	374.287	267.444	233.201	604.588	129.29	136.776	58.356	225.65	170.943	252.357	185.291	194.454	279.194	170.974	130.495
REDCITCYC	TCA cycle VIII (helicobacter)	TCA cycle	Indoor	2.63434	0.0243409	548.764	349.925	443.576	438.038	311.762	271.85	724.653	166.508	159.49	301.46	134.516	141.892	293.824	233.931	210.075	80.9846	338.537	152.173
TCA	TCA cycle I (prokaryotic)	TCA cycle	Indoor	2.58719	0.0379772	672.297	476.897	572.853	599.214	440.672	392.004	830.317	264.096	246.14	204.036	205.332	520.099	497.439	314.896	407.249	464.302	258.014	329.378
PWY-6969	TCA cycle V (2-oxoglutarate:ferredoxin oxidoreductase)	TCA cycle	Outdoor	2.80028	0.0469447	414.184	710.899	429.889	444.677	412.879	387.369	375.422	569.301	502.821	511.096	0	1030.33	1105.95	776.178	846.8	1160.69	677.389	657.947
